# Supplementary material
Source: Research Square preprint supplement (doi:10.21203/rs.3.rs-9825334/v1)
Supplement: Supplementary file 1 [file 1909dbf97b1a76799d32d963.docx]

**Table S1. Comparison of Different GICS Scoring Strategies**

| Strategy | Scoring Rule | Range | AUC | Unique Values |
| --- | --- | --- | --- | --- |
| Original (3-level) | IVC: Dilated=1,  HVDP: Moderate=2, Severe=13, PVDP: Moderate=1, Severe=14 | 0-27 | 0.813 | 9 |
| Binary | IVC: Dilated=1,  HVDP: Abnormal=2,  PVDP: Abnormal=1 | 0-4 | 0.805 | 5 |
| Ordinal (final) | IVC: Dilated=1,  HVDP: Moderate=2, Severe=4, PVDP: Moderate=1, Severe=2 | 0-7 | 0.812 | 7 |
| Trimmed | IVC: Dilated=1,  HVDP: Moderate=2, Severe=5, PVDP: Moderate=1, Severe=3 | 0-8 | 0.813 | 9 |

AGI, acute gastrointestinal injury; AUC, Area under the curve; GICS, gastrointestinal congestion score; HVDP, hepatic venous Doppler pattern; IVC, inferior vena cava; PVDP, portal venous Doppler pattern.
