# Supplementary material
Source: Research Square preprint supplement (doi:10.21203/rs.3.rs-9825334/v1)
Supplement: Supplementary file 2 [file 5c65edd95e128b332e480e32.docx]

**Table S2. The results of the multivariate Logistic regression analysis of the three predictive models**

| Model | Variable | Β value | Standard Error | *P* value | OR (95% CI) |
| --- | --- | --- | --- | --- | --- |
| GICS-Clinical Model | GICS | 1.920 | 0.524 | <0.001 | 6.82(2.85,23.12) |
|  | AGI on D1 | 2.420 | 0.760 | 0.001 | 11.25 (3.30,69.35) |
|  | SOFA | 0.248 | 0.109 | 0.023 | 1.28 (1.06,1.64) |
|  | DM | -2.568 | 0.952 | 0.007 | 0.08 (0.01,0.42) |
|  | MV | 2.557 | 1.260 | 0.042 | 12.90 (1.40,213.28) |
| Unintegrated Ultrasound- Clinical Model | IVC Normal1 | -2.408 | 0.994 | 0.015 | 0.09 (0.01,0.53)¹ |
|  | HVDP Normal2 | -3.336 | 1.246 | 0.007 | 0.04 (0.002,0.29)² |
|  | PVDP Normal3 | -1.766 | 1.117 | 0.114 | 0.17 (0.01,1.23)³ |
|  | AGI on D1 | 2.451 | 0.792 | 0.002 | 11.59 (3.28,80.05) |
|  | SOFA | 0.248 | 0.112 | 0.026 | 1.28 (1.05,1.65) |
|  | DM | -2.728 | 1.025 | 0.008 | 0.07 (0.007,0.40) |
|  | MV | 2.358 | 1.257 | 0.061 | 10.57 (1.15,185.78) |
| Clinical Model | AGI on D1 | 1.711 | 0.548 | 0.002 | 5.53 (2.18,18.91) |
|  | SOFA | 0.180 | 0.074 | 0.015 | 1.20 (1.04,1.40) |
|  | DM | -1.375 | 0.637 | 0.031 | 0.25 (0.07,0.85) |
|  | MV | 2.258 | 0.920 | 0.014 | 9.56 (1.85,75.07) |

**Note:** ¹ Normal vs. Dilated. ² Normal vs. Severe; HVDP Moderate was not selected in the LASSO regression and was therefore excluded from the analysis. ³ Normal vs. Severe; PVDP Moderate was not selected in the LASSO regression and was therefore excluded from the analysis. The extremely wide confidence intervals observed for HVDP Severe and PVDP Severe (HVDP Severe: OR = 6.47 × 10⁴; PVDP Severe: OR = 5.02 × 10⁶) were driven by data sparsity, indicating a potential data separation phenomenon.

AGI, acute gastrointestinal injury; CI, confidence interval; DM, diabetes mellitus; GICS, gastrointestinal congestion score; HVDP, hepatic venous Doppler pattern; IVC, inferior vena cava; MV, mechanical ventilation; OR, odds ratio; PVDP, portal venous Doppler pattern; SOFA, sequential organ failure assessment.
